# Supplementary material for: A Physiologically-Based Pharmacokinetic Model to Describe Ciprofloxacin Pharmacokinetics Over the Entire Span of Life
Source: Springer Nature journal article supplement (doi:10.1007/s40262-018-0661-6), 2018-05-08
Supplement: MOESM1 [file 15746230]

A physiologically based pharmacokinetic model to describe ciprofloxacin pharmacokinetics over the entire span of life

Running heading: PBPK modeling of ciprofloxacin in pediatric and geriatric patients

Jan-Frederik Schlender1,2), Donato Teutonico2,5), Katrin Coboeken2), Katrin Schnizler2), Thomas Eissing2), Stefan Willmann3), Ulrich Jaehde1) and Heino Stass4)

1) Institute of Pharmacy, Clinical Pharmacy, University of Bonn, Bonn, Germany

2) Systems Pharmacology & Medicine, Bayer AG, Leverkusen, Germany

3) Clinical Pharmacometrics, Bayer AG, Wuppertal, Germany

4) Clinical Pharmacology, Bayer AG, Wuppertal, Germany

5)Current address: Clinical PK and Pharmacometrics, Institut de Recherches Internationales Servier, Suresnes, France.

**Corresponding author:**

Jan-Frederik Schlender

Bayer AG

Research & Development, Pharmaceuticals

Systems Pharmacology & Medicine

51373 Leverkusen, Germany

Phone: +49 214 30 44368

Email: [jan.schlender@bayer.com](mailto:jan.schlender@bayer.com)

[jan.schlender@uni-bonn.de](mailto:jan.schlender@uni-bonn.de)

**Sensitivity analysis**

The impact of certain parameter changes was estimated in a sensitivity analysis (SA) for simulated Cmax following oral administration and AUC for representative individuals characterizing different regions in parameters space. Investigating parameter influences on outputs serve as an indicator for model performance, reliability, and significance of the results achieved.

The SA covered the entire age range assessed in this simulation study and was calculated for all 136 non-derived model parameters. The remaining parameters in the PBPK model are derived from these and are therefore investigated implicitly. Age-classes were defined following the FDA binning [[1](#_ENREF_1)] for the pediatric age range and continued with ten-year age steps from 30 years to the oldest old.

Sensitivity analysis was performed numerically by varying each parameter separately with the factors 1/1.1, 1/1.05, 1.05, and 1.1. Individual sensitivity is then calculated as the slope of the linear regression line through the relative pharmacokinetic parameter changes in dependence of the different parameter variations. In other words, the sensitivity *S* is calculated for the representative virtual individuals detailed above as the average for the 4 perturbations Δ of different magnitude according to

|  | Eq. 3 |
| --- | --- |

with *n* = 4 and PK standing for the two (i.e. j=1,2) pharmacokinetic parameter outputs, and *p* standing for the different parameters (*i*=1,2,…,136). The *pi/PKj*-factor serves as normalization to the nominal values, which is important when comparing the influence of different characteristics and parameter values. Thus, the sensitivity values are dimensionless quantities. By this, a sensitivity of -1.0 implies that a 10% increase of the parameters, leads to a 10% decrease of the pharmacokinetic parameter value, and a sensitivity of +0.5 implies that a 10% increase of the parameters, leads to a 5% increase of the pharmacokinetic parameter value.

For each pharmacokinetic parameter output (*PKj*) and parameter (*pi*), maximal sensitivity values are defined as the maximum of the absolute sensitivity value for the set of all individuals *Ind*:

|  | Eq. 4 |
| --- | --- |

The parameters are then sorted in descending order according to . Mean parameter sensitivity values and their standard deviation can be defined accordingly.

For each individual k, the variances of the sensitivity values are cumulated in order of their sorting defined above, according to

|  | Eq. 5 |
| --- | --- |

with l=1,…,136. The cumulated sensitivity as defined above includes normalization to the absolute total sensitivity. Therefore, the normalized total sensitivity *Stotal* = *SCum,k,136 j* = 1. A cut-off is defined by capturing 90 % of the cumulated total sensitivity. Since the sum of parameters needed to reach the cut-off as well as the identified parameters within this range might differ between the analyzed age groups, common and deviating parameters within this range were discussed.

**Supplementary tables**

**Supplementary Table 1 Results of the parameter identification for oral administration**

| Parameter name | Best value |
| --- | --- |
| Dissolution shape |  |
| Sucrose suspension | 0.53 |
| 100 mg tablet | 0.30 |
| 250  mg tablet | 0.70 |
| 500  mg tablet | 0.81 |
| 750  mg tablet | 0.65 |
| Dissolution time |  |
| Sucrose suspension | 73.49 min |
| 100 mg tablet | 43.54 min |
| 250  mg tablet | 60.68 min |
| 500  mg tablet | 44.75 min |
| 750  mg tablet | 60.85 min |
| Solubility gain per charge | 1212.64 |

**Supplementary figures**

**Supplementary Figure 1 Correlation matrix for parameter identification of distribution, metabolism and elimination parameters after intravenous administration**


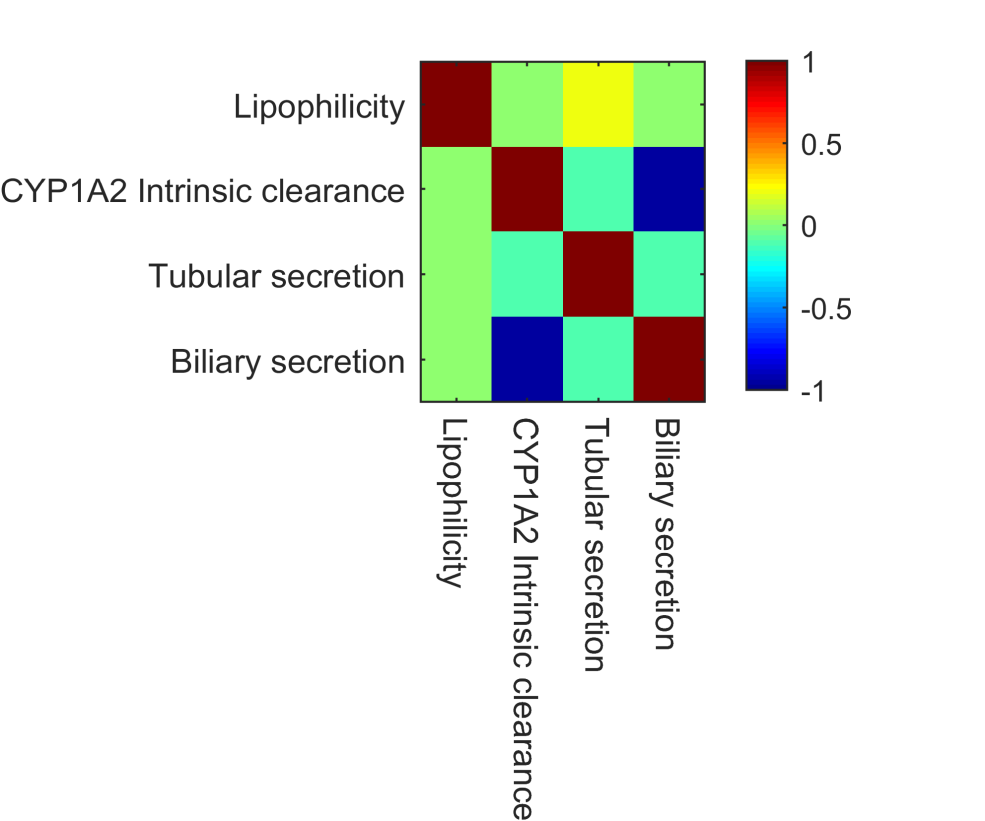


**Supplementary Figure 2 Correlation matrix for parameter identification of oral absorption parameters**


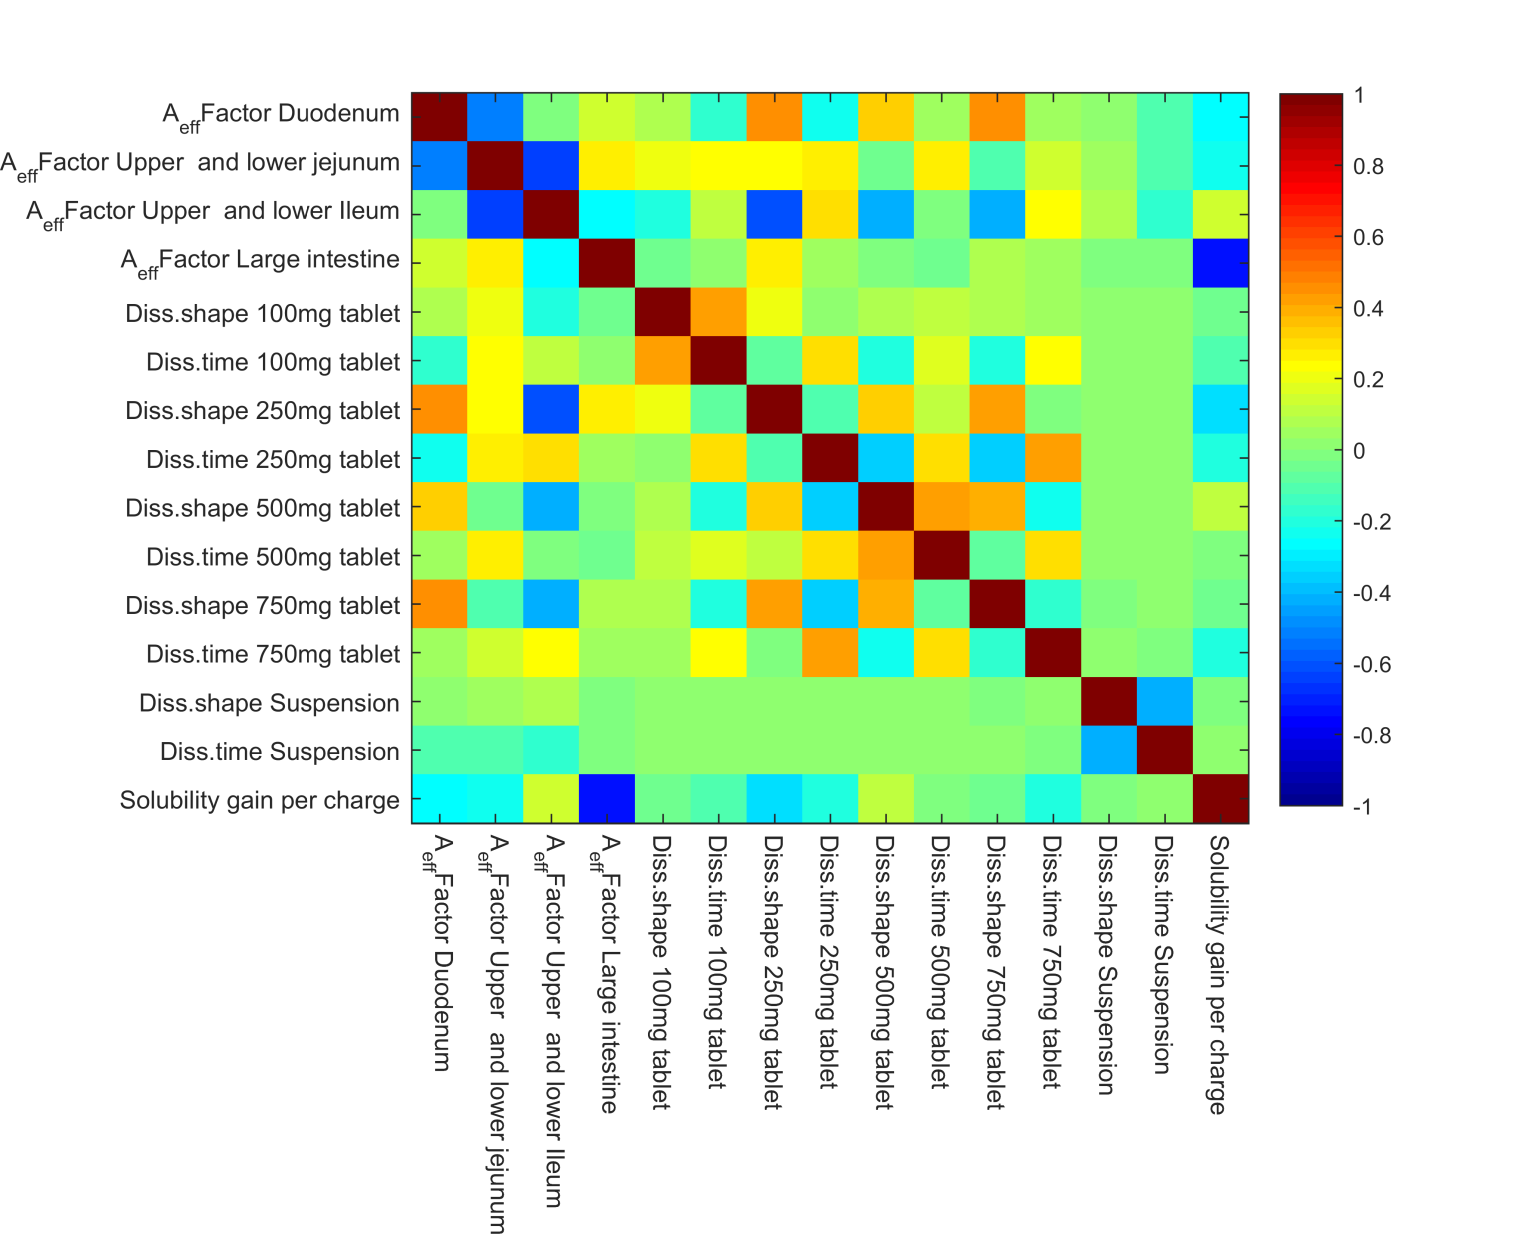


# References

1. FDA. General Clinical Pharmacology Considerations for Pediatric Studies for Drugs and Biological Products - Guidance for Industry. In: Services USDoHaH, editor.; 2014.
